# Supplementary material for: The ENCODE Uniform Analysis Pipelines
Source: PubMed Central journal article supplement (PMC10104020; doi:10.1101/2023.04.04.535623), 2023-04-06
Supplement: media-1.pdf [file media-1.pdf]

| <b>SamtoolsFlagstatsQualityMetric</b> | <b>DNase-seq, Total RNA-seq,</b>                           |
|---------------------------------------|------------------------------------------------------------|
| diff_chroms                           | flagstats: mate mapped different chr (mapQ>=5)             |
| diff_chroms_qc_failed                 | flagstats: mate mapped different chr (mapQ>=5) - qc failed |
| duplicates                            | flagstats: duplicates                                      |
| duplicates_qc_failed                  | flagstats: duplicates - qc failed                          |
| mapped                                | flagstats: mapped                                          |
| mapped_pct                            | flagstats: mapped - percent                                |
| mapped_qc_failed                      | flagstats: mapped - qc failed                              |
| paired                                | flagstats: paired                                          |
| paired_properly                       | flagstats: properly paired                                 |
| paired_properly_pct                   | flagstats: properly paired - percent                       |
| paired_properly_qc_failed             | flagstats: properly paired - qc failed                     |
| paired_qc_failed                      | flagstats: paired - qc failed                              |
| read1                                 | flagstats: read1                                           |
| read1_qc_failed                       | flagstats: read1 - qc failed                               |
| read2                                 | flagstats: read2                                           |
| read2_qc_failed                       | flagstats: read2 - qc failed                               |
| singletons                            | flagstats: singletons                                      |
| singletons_pct                        | flagstats: singletons - percent                            |
| singletons_qc_failed                  | flagstats: singletons - qc failed                          |
| total                                 | flagstats: total                                           |
| total_qc_failed                       | flagstats: total - qc failed                               |
| with_itself                           | flagstats: with itself and mate mapped                     |
| with_itself_qc_failed                 | flagstats: with itself and mate mapped - qc failed         |
| usable_fragments                      | Usable fragments, based on the mapped value.               |
|                                       |                                                            |
| <b>SamtoolsStatsQualityMetric</b>     | <b>DNase-seq, WGBS</b>                                     |
| 1st fragments                         | samtools --stats: 1st fragments                            |
| average length                        | samtools --stats: average length                           |
| average quality                       | samtools --stats: average quality                          |
| bases duplicated                      | samtools --stats: bases duplicated                         |
| bases mapped                          | samtools --stats: bases mapped                             |

|                                 |                                                                      |
|---------------------------------|----------------------------------------------------------------------|
| bases mapped (cigar)            | samtools --stats: bases mapped (cigar)                               |
| bases trimmed                   | samtools --stats: bases trimmed                                      |
| error rate                      | samtools --stats: error rate                                         |
| filtered sequences              | samtools --stats: filtered sequences                                 |
| insert size average             | samtools --stats: insert size - average                              |
| insert size standard deviation  | samtools --stats: insert size - standard deviation                   |
| inward oriented pairs           | samtools --stats: inward oriented pairs                              |
| is sorted                       | samtools --stats: is sorted                                          |
| last fragments                  | samtools --stats: last fragments                                     |
| maximum length                  | samtools --stats: maximum length                                     |
| mismatches                      | samtools --stats: mismatches                                         |
| non-primary alignments          | samtools --stats: non-primary alignments                             |
| outward oriented pairs          | samtools --stats: outward oriented pairs                             |
| pairs on different chromosomes  | samtools --stats: pairs on different chromosomes                     |
| pairs with other orientation    | samtools --stats: pairs with other orientation                       |
| raw total sequences             | samtools --stats: raw total sequences                                |
| reads MQ0                       | samtools --stats: reads MQ0                                          |
| reads QC failed                 | samtools --stats: reads QC failed                                    |
| reads duplicated                | samtools --stats: reads duplicated                                   |
| reads mapped                    | samtools --stats: reads mapped                                       |
| reads mapped and paired         | samtools --stats: reads mapped and paired                            |
| reads paired                    | samtools --stats: reads paired                                       |
| reads properly paired           | samtools --stats: reads properly paired                              |
| reads unmapped                  | samtools --stats: reads unmapped                                     |
| sequences                       | samtools --stats: sequences                                          |
| total length                    | samtools --stats: total length                                       |
|                                 |                                                                      |
| <b>CorrelationQualityMetric</b> | <b>Deprecated</b>                                                    |
| Pearson correlation             | Pearson's R correlation                                              |
| Spearman correlation            | Spearman's rank correlation                                          |
| Items                           | Count of items from two different datasets that are being correlated |

|                    |                                                                          |
|--------------------|--------------------------------------------------------------------------|
| Standard deviation | Standard deviation of difference                                         |
| MAD of log ratios  | Mean-Average-Deviation (MAD) of replicate log ratios from quantification |
| Details            | Description of methods                                                   |
