# Supplementary material for: The ENCODE Uniform Analysis Pipelines
Source: PubMed Central journal article supplement (PMC10104020; doi:10.1101/2023.04.04.535623), 2023-04-06
Supplement: media-2.pdf [file media-2.pdf]

| <b>HicQualityMetric</b>              |                                                                                                        |
|--------------------------------------|--------------------------------------------------------------------------------------------------------|
| sequenced_reads                      | Number of total reads sequenced for library                                                            |
| sequenced_read_pairs                 | Number of total read pairs sequenced for library                                                       |
| no_chimera_found                     | Number of reads where no chimera was found                                                             |
| 0_alignments                         | Number of reads that did not align to the reference genome                                             |
| 1_alignment                          | Number of reads that align to one position in the reference genome                                     |
| 1_alignment_unique                   | Number of unique reads that align to one position in the reference genome                              |
| 1_alignment_duplicates               | Number of duplicate reads that align to one position in the reference genome                           |
| 2_alignments                         | Number of reads that align to two positions in the reference genome                                    |
| 2_alignments_a_b                     | Number of reads that align to two positions in the reference genome of the type A...B                  |
| 2_alignment_duplicates               | Number of duplicate reads that align to two positions in the reference genome                          |
| 2_alignment_unique                   | Number of unique reads that align to two positions in the reference genome                             |
| 2_alignments_a1_a2b_a1b2_b1a2        | Number of reads that align to two positions in the reference genome of the type A1...A2B; A1B2...B1A2  |
| 3_or_more_alignments                 | Number of reads that align to three or more positions in the reference genome                          |
| pct_no_chimera_found                 | Percent of reads where no chimera was found                                                            |
| pct_0_alignments                     | Percent of reads that did not align to the reference genome                                            |
| pct_1_alignment                      | Percent of reads that align to one position in the reference genome                                    |
| pct_1_alignment_unique               | Percent of unique reads that align to one position in the reference genome                             |
| pct_1_alignment_duplicates           | Percent of duplicate reads that align to one position in the reference genome                          |
| pct_sequenced_1_alignment_unique     | Percent of unique reads that align to one position in the reference genome                             |
| pct_sequenced_1_alignment_duplicates | Percent of duplicate reads that align to one position in the reference genome                          |
| pct_2_alignments                     | Percent of reads that align to two positions in the reference genome                                   |
| pct_2_alignment_unique               | Percent of unique reads that align to two positions in the reference genome                            |
| pct_2_alignment_duplicates           | Percent of duplicate reads that align to two positions in the reference genome                         |
| pct_2_alignments_a_b                 | Percent of reads that align to two positions in the reference genome of the type A...B                 |
| pct_2_alignments_a1_a2b_a1b2_b1a2    | Percent of reads that align to two positions in the reference genome of the type A1...A2B; A1B2...B1A2 |
| pct_sequenced_2_alignment_unique     | Percent of unique reads that align to two positions in the reference genome                            |
| pct_sequenced_2_alignment_duplicates | Percent of duplicate reads that align to two positions in the reference genome                         |
| pct_3_or_more_alignments             | Percent of reads that align to three or more positions in the reference genome                         |
| pct_unique_total_duplicates          | Percent of duplicate reads that align to the reference genome                                          |
| pct_unique_total_unique              | Percent of unique reads that align to the reference genome                                             |
| one_or_both_reads_unmapped           | Number of read pairs where one or both reads is unmapped                                               |

|                                                |                                                                                            |
|------------------------------------------------|--------------------------------------------------------------------------------------------|
| pct_one_or_both_reads_unmapped                 | Percent of read pairs where one or both reads is unmapped                                  |
| ligation_motif_present                         | Number of reads containing a ligation motif                                                |
| pct_ligation_motif_present                     | Percent of reads containing a ligation motif                                               |
| avg_insert_size                                | Average insert size                                                                        |
| total_unique                                   | Number of unique reads that align to the reference genome                                  |
| pct_sequenced_total_unique                     | Percent of unique reads that align to the reference genome                                 |
| total_duplicates                               | Number of duplicate reads that align to the reference genome                               |
| pct_sequenced_total_duplicates                 | Percent of duplicate reads that align to the reference genome                              |
| library_complexity_estimate                    | Estimate of Library Complexity                                                             |
| library_complexity_estimate_1_alignment        | Estimate of Library Complexity (for reads with one alignment)                              |
| library_complexity_estimate_2_alignments       | Estimate of Library Complexity (for reads with two alignments)                             |
| library_complexity_estimate_1_and_2_alignments | Estimate of Library Complexity (for reads with one and two alignments)                     |
| intra_fragment_reads                           | Number of intra-fragment reads                                                             |
| pct_sequenced_intra_fragment_reads             | Percent of intra-fragment reads                                                            |
| pct_unique_intra_fragment_reads                | Percent of unique intra-fragment reads                                                     |
| below_mapq_threshold                           | Number of reads below the mapQ threshold                                                   |
| pct_sequenced_below_mapq_threshold             | Percent of reads below the mapQ threshold                                                  |
| pct_unique_below_mapq_threshold                | Percent of unique reads below the mapQ threshold                                           |
| hic_contacts                                   | Number of Hi-C contacts                                                                    |
| pct_sequenced_hic_contacts                     | Percent of Hi-C contacts                                                                   |
| pct_unique_hic_contacts                        | Percent of unique Hi-C contacts                                                            |
| pct_5_prime_bias_long_range                    | Percent of read ends from long range contacts mapping closer to the 5' end of the fragment |
| pct_3_prime_bias_long_range                    | Percent of read ends from long range contacts mapping closer to the 3' end of the fragment |
| lior_convergence                               | Distance in basepairs at which left, right, inner, and outer pair types converge           |
| pct_left_pair_type                             | Percentage of Hi-C contacts with left pair type                                            |
| pct_right_pair_type                            | Percentage of Hi-C contacts with right pair type                                           |
| pct_inner_pair_type                            | Percentage of Hi-C contacts with inner pair type                                           |
| pct_outer_pair_type                            | Percentage of Hi-C contacts with outer pair type                                           |
| inter_chromosomal                              | Number of inter-chromosomal Hi-C contacts                                                  |
| pct_sequenced_inter_chromosomal                | Percent of inter-chromosomal Hi-C contacts                                                 |
| pct_unique_inter_chromosomal                   | Percent of unique inter-chromosomal Hi-C contacts                                          |
| intra_chromosomal                              | Number of intra-chromosomal Hi-C contacts                                                  |

|                                            |                                                                                                         |
|--------------------------------------------|---------------------------------------------------------------------------------------------------------|
| pct_sequenced_intra_chromosomal            | Percent of intra-chromosomal Hi-C contacts                                                              |
| pct_unique_intra_chromosomal               | Percent of unique intra-chromosomal Hi-C contacts                                                       |
| short_range_less_than_500bp                | Number of intra-chromosomal Hi-C contacts with loci less than 500 basepairs apart                       |
| pct_sequenced_short_range_less_than_500bp  | Percent of intra-chromosomal Hi-C contacts with loci less than 500 basepairs apart                      |
| pct_unique_short_range_less_than_500bp     | Percent of unique intra-chromosomal Hi-C contacts with loci less than 500 basepairs apart               |
| short_range_500bp_to_5kb                   | Number of intra-chromosomal Hi-C contacts with loci between 500 basepairs and 5 kilobases apart         |
| pct_sequenced_short_range_500bp_to_5kb     | Percent of intra-chromosomal Hi-C contacts with loci between 500 basepairs and 5 kilobases apart        |
| pct_unique_short_range_500bp_to_5kb        | Percent of unique intra-chromosomal Hi-C contacts with loci between 500 basepairs and 5 kilobases apart |
| short_range_5kb_to_20kb                    | Number of intra-chromosomal Hi-C contacts with loci between 5 and 20 kilobases apart                    |
| pct_sequenced_short_range_5kb_to_20kb      | Percent of intra-chromosomal Hi-C contacts with loci between 5 and 20 kilobases apart                   |
| pct_unique_short_range_5kb_to_20kb         | Percent of unique intra-chromosomal Hi-C contacts with loci between 5 and 20 kilobases apart            |
| long_range_greater_than_20kb               | Number of intra-chromosomal Hi-C contacts with loci greater than 20 kilobases apart                     |
| pct_sequenced_long_range_greater_than_20kb | Percent of intra-chromosomal Hi-C contacts with loci greater than 20 kilobases apart                    |
| pct_unique_long_range_greater_than_20kb    | Percent of unique intra-chromosomal Hi-C contacts with loci greater than 20 kilobases apart             |
