# Supplementary material for: The ENCODE Uniform Analysis Pipelines
Source: PubMed Central journal article supplement (PMC10104020; doi:10.1101/2023.04.04.535623), 2023-04-06
Supplement: media-3.pdf [file media-3.pdf]

| <b>StarQualityMetric</b>                   | <b>total RNA-seq, microRNA-seq</b>                                                                                                    |
|--------------------------------------------|---------------------------------------------------------------------------------------------------------------------------------------|
| % of chimeric reads                        | STAR % of chimeric reads                                                                                                              |
| % of reads mapped to multiple loci         | STAR % of reads mapped to multiple loci                                                                                               |
| % of reads mapped to too many loci         | STAR % of reads mapped to too many loci                                                                                               |
| % of reads unmapped: other                 | STAR % of reads unmapped: other                                                                                                       |
| % of reads unmapped: too many mismatches   | STAR % of reads unmapped: too many mismatches                                                                                         |
| % of reads unmapped: too short             | STAR % of reads unmapped: too short                                                                                                   |
| Average input read length                  | STAR Average input read length                                                                                                        |
| Average mapped length                      | STAR Average mapped length                                                                                                            |
| Deletion average length                    | STAR Deletion average length                                                                                                          |
| Deletion rate per base                     | STAR Deletion rate per base                                                                                                           |
| Insertion average length                   | STAR Insertion average length                                                                                                         |
| Insertion rate per base                    | STAR Insertion rate per base                                                                                                          |
| Mapping speed, Million of reads per hour   | STAR Mapping speed, Million of reads per hour                                                                                         |
| Mismatch rate per base, %                  | STAR Mismatch rate per base, %                                                                                                        |
| Number of chimeric reads                   | STAR Number of chimeric reads                                                                                                         |
| Number of input reads                      | STAR Number of input reads                                                                                                            |
| Number of reads mapped to multiple loci    | STAR Number of reads mapped to multiple loci                                                                                          |
| Number of reads mapped to too many loci    | STAR Number of reads mapped to too many loci                                                                                          |
| Number of splices: AT/AC                   | STAR Number of splices: AT/AC                                                                                                         |
| Number of splices: Annotated (sjdb)        | STAR Number of splices: Annotated (sjdb)                                                                                              |
| Number of splices: GC/AG                   | STAR Number of splices: GC/AG                                                                                                         |
| Number of splices: GT/AG                   | STAR Number of splices: GT/AG                                                                                                         |
| Number of splices: Non-canonical           | STAR Number of splices: Non-canonical                                                                                                 |
| Number of splices: Total                   | STAR Number of splices: Total                                                                                                         |
| Uniquely mapped reads %                    | STAR Uniquely mapped reads %                                                                                                          |
| Uniquely mapped reads number               | STAR Uniquely mapped reads number                                                                                                     |
| read_depth                                 | Sum of the uniquely mapped reads number and the number of reads mapped to multiple loci.                                              |
|                                            |                                                                                                                                       |
| <b>GeneQuantificationQualityMetric</b>     | <b>total RNA-seq</b>                                                                                                                  |
| number_of_genes_detected                   | Number of Genes Detected                                                                                                              |
|                                            |                                                                                                                                       |
| <b>GeneTypeQuantificationQualityMetric</b> | <b>total RNA-seq</b>                                                                                                                  |
| Mt_rRNA                                    | Number of reads assigned to transcripts from the \"Mt_rRNA\" GENCODE biotype; mitochondrial rRNAs                                     |
| antisense                                  | Number of reads in transcripts that overlap the genomic span (i.e. exon or introns) of a protein-coding locus on the opposite strand. |
| miRNA                                      | Number of reads assigned to transcripts from the \"miRNA\" GENCODE biotype; microRNAs                                                 |

|                                               |                                                                                                             |
|-----------------------------------------------|-------------------------------------------------------------------------------------------------------------|
| processed_transcript                          | Number of reads mapped to genomic regions which don't contain an ORF.                                       |
| protein_coding                                | Number of reads assigned to transcripts from the "protein_coding" GENCODE biotype; contain ORFs             |
| rRNA                                          | Number of reads assigned to transcripts from the "rRNA" GENCODE biotype; encode for rRNAs                   |
| ribozyme                                      | Number of reads assigned to transcripts from the "ribozyme" GENCODE biotype; encode for ribozymes           |
| sRNA                                          | Number of reads assigned to transcripts from the "sRNA" GENCODE biotype; encode for sRNAs                   |
| scaRNA                                        | Number of reads assigned to transcripts from the "scaRNA" GENCODE biotype; encode for scaRNAs               |
| sense_intronic                                | Number of reads in long non-coding transcript in introns of a coding gene that does not overlap any exons.  |
| sense_overlapping                             | Number of reads in long non-coding transcript that contains a coding gene in its intron on the same strand. |
| snRNA                                         | Number of reads assigned to transcripts from the "snRNA" GENCODE biotype; encode for snRNAs                 |
| snoRNA                                        | Number of reads assigned to transcripts from the "snoRNA" GENCODE biotype; encode for snoRNAs               |
| spikein                                       | Number of reads assigned to transcripts from the spike ins                                                  |
|                                               |                                                                                                             |
| <b>MadQualityMetric</b>                       | <b>total RNA-seq</b>                                                                                        |
| SD of log ratios                              | Standard Deviation of replicate log ratios from quantification                                              |
| Pearson correlation                           | Pearson correlation coefficient of replicates from quantification                                           |
| Spearman correlation                          | Spearman correlation coefficient of replicates from quantification                                          |
| MAD of log ratios                             | Mean-Average-Deviation (MAD) of replicate log ratios from quantification                                    |
|                                               |                                                                                                             |
| <b>MicroRnaMappingQualityMetric</b>           | <b>microRNA-seq</b>                                                                                         |
| aligned_reads                                 | Number of aligned reads                                                                                     |
|                                               |                                                                                                             |
| <b>MicroRnaQuantificationQualityMetric</b>    | <b>microRNA-seq</b>                                                                                         |
| expressed_mirnas                              | Number of miRNAs expressed                                                                                  |
|                                               |                                                                                                             |
| <b>LongReadRnaMappingQualityMetric</b>        | <b>long read RNA-seq</b>                                                                                    |
| full_length_non_chimeric_read_count           | Quantity of reads that are full-length and do not contain a chimeric adaptor arrangement.                   |
| mapping_rate                                  | Proportion of reads mapping to the genome                                                                   |
|                                               |                                                                                                             |
| <b>LongReadRnaQuantificationQualityMetric</b> | <b>long read RNA-seq</b>                                                                                    |
| genes_detected                                | Number of GENCODE genes detected for the replicate                                                          |
