# Supplementary material for: The ENCODE Uniform Analysis Pipelines
Source: PubMed Central journal article supplement (PMC10104020; doi:10.1101/2023.04.04.535623), 2023-04-06
Supplement: media-5.pdf [file media-5.pdf]

| <b>CpgCorrelationQualityMetric</b>   |                                                                |
|--------------------------------------|----------------------------------------------------------------|
| CpG pairs                            | Number of CpG pairs                                            |
| CpG pairs with atleast 10 reads each | CpG pairs with atleast 10 reads each                           |
| Pearson correlation                  | Pearson's correlation of CpG pairs with at least 10 reads each |
|                                      |                                                                |
| <b>GembsAlignmentQualityMetric</b>   |                                                                |
| sequenced_reads                      | Number of sequenced reads                                      |
| unmapped_reads                       | Number of unmapped reads                                       |
| pct_unmapped_reads                   | Percentage of unmapped reads                                   |
| correct_pairs                        | Number of correct pairs                                        |
| general_reads                        | Number of general reads                                        |
| average_coverage                     | Average coverage                                               |
| pct_general_reads                    | Percentage of general reads                                    |
| unique_fragments                     | Number of unique fragments                                     |
| pct_unique_fragments                 | Percentage of unique fragments                                 |
| conversion_rate                      | Bisulfite conversion rate                                      |
| reads_under_conversion_control       | Number of reads under conversion control                       |
| pct_reads_under_conversion_control   | Percentage of reads under conversion control                   |
| reads_over_conversion_control        | Number of reads over conversion control                        |
| pct_reads_over_conversion_control    | Percentage of reads over conversion control                    |
| bisulfite_reads_c2t                  | Number of bisulfite reads C2T                                  |
| pct_bisulfite_reads_c2t              | Percentage of bisulfite reads C2T                              |
| bisulfite_reads_g2a                  | Number of bisulfite reads G2A                                  |
| pct_bisulfite_reads_g2a              | Percentage of bisulfite reads G2A                              |
