# Supplementary material for: The ENCODE Uniform Analysis Pipelines
Source: PubMed Central journal article supplement (PMC10104020; doi:10.1101/2023.04.04.535623), 2023-04-06
Supplement: media-6.pdf [file media-6.pdf]

|                                                    |                                                                                                                                                                                                      |                   |  |  |
|----------------------------------------------------|------------------------------------------------------------------------------------------------------------------------------------------------------------------------------------------------------|-------------------|--|--|
| read length                                        | Read length                                                                                                                                                                                          |                   |  |  |
| fragment length                                    | Fragment length/strandshift. This is the estimated fragment length/strand shift for each dataset as estimated by strand cross-correlation analysis                                                   |                   |  |  |
| NRF                                                | Non redundant fraction (indicates library complexity). Distinct Locations Mapped / Sampled Reads                                                                                                     |                   |  |  |
| PBC1                                               | PCR Bottlenecking coefficient 1 = Single-read Locations / Distinct Locations                                                                                                                         |                   |  |  |
| PBC2                                               | PCR Bottlenecking coefficient 2 (indicates library complexity) = Single-read Locations / Multi-read Locations                                                                                        |                   |  |  |
| NSC                                                | Normalized strand cross-correlation = FRAGLEN_CC / MIN_CC. Ratio of strand cross-correlation at estimated fragment length to the minimum cross-correlation over all shifts.                          |                   |  |  |
| RSC                                                | Relative cross correlation coefficient. Ratio of strand cross-correlation at fragment length and at read length                                                                                      |                   |  |  |
| cross_correlation_plot                             | Cross-correlation plot                                                                                                                                                                               |                   |  |  |
| <b>HistoneChIPSeqQualityMetric</b>                 |                                                                                                                                                                                                      | <b>Deprecated</b> |  |  |
| nreads                                             | # of starting reads in the pool (if replicated) or experiment (if unreplicated)                                                                                                                      |                   |  |  |
| nreads_in_peaks                                    | # of reads that fall within peaks.                                                                                                                                                                   |                   |  |  |
| npeak_overlap                                      | # peaks overlapping with true replicate or pooled pseudoreplicate peaks                                                                                                                              |                   |  |  |
| Fp                                                 | Fraction reads in replicated/stable narrowPeaks (FRIP) from pooled pseudoreplicates                                                                                                                  |                   |  |  |
| F1                                                 | Fraction reads in replicated/stable narrowPeaks (FRIP) from true replicates                                                                                                                          |                   |  |  |
| F1                                                 | Fraction reads in replicated/stable narrowPeaks (FRIP) from replicate 1 self-pseudoreplicates that pass internal pseudoreplication, when self-pseudoreplication is done on unreplicated experiments. |                   |  |  |
| F2                                                 | Fraction reads in replicated/stable narrowPeaks (FRIP) from replicate 2 self-pseudoreplicates                                                                                                        |                   |  |  |
| frp                                                | Best fraction reads in peaks (FRIP) from peaks                                                                                                                                                       |                   |  |  |
| <b>IDRQualityMetric</b>                            |                                                                                                                                                                                                      | <b>Deprecated</b> |  |  |
| Fp                                                 | Fraction reads in IDR peaks (FRIP) from pooled pseudoreplicates                                                                                                                                      |                   |  |  |
| F1                                                 | Fraction reads in IDR peaks (FRIP) from true replicates                                                                                                                                              |                   |  |  |
| F1                                                 | Fraction reads in peaks (FRIP) from replicate 1 self-pseudoreplicates that pass the internal pseudoreplication IDR threshold, when self-pseudoreplication is done on unreplicated experiments.       |                   |  |  |
| F2                                                 | Fraction reads in peaks (FRIP) from replicate 2 self-pseudoreplicates                                                                                                                                |                   |  |  |
| Np                                                 | Number of peaks from pooled pseudoreplicates                                                                                                                                                         |                   |  |  |
| Nt                                                 | Number of peaks from true replicates                                                                                                                                                                 |                   |  |  |
| N1                                                 | Number of peaks from replicate 1 self-pseudoreplicates that pass the internal pseudoreplication IDR threshold, when self-pseudoreplication is done on unreplicated experiments.                      |                   |  |  |
| N2                                                 | Number of peaks from replicate 2 self-pseudoreplicates                                                                                                                                               |                   |  |  |
| IDR_cutoff                                         | IDR cutoff threshold for this experiment                                                                                                                                                             |                   |  |  |
| self_consistency_ratio                             | IDR self-consistency ratio for this experiment                                                                                                                                                       |                   |  |  |
| rescue_ratio                                       | IDR rescue ratio for this experiment                                                                                                                                                                 |                   |  |  |
| reproducibility_test                               | IDR reproducibility test result for this experiment                                                                                                                                                  |                   |  |  |
| N_optimal                                          | Number of peaks in the IDR optimal set                                                                                                                                                               |                   |  |  |
| N_conservative                                     | Number of peaks in the IDR conservative set                                                                                                                                                          |                   |  |  |
| IDR_plot_true                                      | IDR dispersion plot for true replicates                                                                                                                                                              |                   |  |  |
| IDR_plot_rep1_pr                                   | IDR dispersion plot for replicate 1 pseudo-replicates                                                                                                                                                |                   |  |  |
| IDR_plot_rep2_pr                                   | IDR dispersion plot for replicate 2 pseudo-replicates                                                                                                                                                |                   |  |  |
| IDR_plot_poo_pr                                    | IDR dispersion plot for pool pseudo-replicates                                                                                                                                                       |                   |  |  |
| IDR_parameters_true                                | IDR run parameters for true replicates                                                                                                                                                               |                   |  |  |
| IDR_parameters_rep1_pr                             | IDR run parameters for replicate 1 pseudo-replicates                                                                                                                                                 |                   |  |  |
| IDR_parameters_rep2_pr                             | IDR run parameters for replicate 2 pseudo-replicates                                                                                                                                                 |                   |  |  |
| IDR_parameters_poo_pr                              | IDR run parameters for pool pseudo-replicates                                                                                                                                                        |                   |  |  |
| frp                                                | Fraction reads in IDR peaks (FRIP) from optimal peaks                                                                                                                                                |                   |  |  |
| <b>IdrSummaryQualityMetric</b>                     |                                                                                                                                                                                                      | <b>Deprecated</b> |  |  |
| Final parameter values (mu, sigma, rho, and mix)   | IDR: Final parameter values (mu, sigma, rho, and mix)                                                                                                                                                |                   |  |  |
| IDR cutoff                                         | IDR: IDR cutoff                                                                                                                                                                                      |                   |  |  |
| Initial parameter values (mu, sigma, rho, and mix) | IDR: Initial parameter values (mu, sigma, rho, and mix)                                                                                                                                              |                   |  |  |
| Number of peaks passing IDR cutoff                 | IDR: Number of peaks passing IDR cutoff                                                                                                                                                              |                   |  |  |
| Number of reported peaks                           | IDR: Number of reported peaks                                                                                                                                                                        |                   |  |  |
| Percent peaks passing IDR cutoff                   | IDR: Percent peaks passing IDR cutoff                                                                                                                                                                |                   |  |  |
| Percent reported peaks                             | IDR: Percent reported peaks                                                                                                                                                                          |                   |  |  |
